# Supplementary material for: What are the expectations and experiences of a GMH research programme delivered in Bosnia-Herzegovina, Colombia and Uganda? A prospective longitudinal qualitative study
Source: HighWire-hosted journal article supplement (doi:10.1136/bmjopen-2021-059590), 2022-06-01
Supplement: bmjopen-2021-059590supp001_data_supplement.pdf [file bmjopen-2021-059590supp001_data_supplement.pdf]

Appendices

Appendix A Topic Guides

| Section                          | Question (Expectations)                                                                                                                                                                                                                                                                                                                | Question (Experiences)                                                                                                                                                                                                                                                                                                      |
|----------------------------------|----------------------------------------------------------------------------------------------------------------------------------------------------------------------------------------------------------------------------------------------------------------------------------------------------------------------------------------|-----------------------------------------------------------------------------------------------------------------------------------------------------------------------------------------------------------------------------------------------------------------------------------------------------------------------------|
| Introduction                     | <p>Please tell me a bit about yourself and your professional role(s)</p> <p>Have you previously worked on international projects, or ‘global health’ projects?</p> <p>If so, please describe your experience working on such projects?</p>                                                                                             | <p>Please tell me a bit about yourself and your professional role(s)</p> <p>[If appropriate] To what extent did your previous experiences or collaborations help you in this role?</p> <p>[If appropriate] How did this collaboration differ from previous collaborations?</p>                                              |
| Motivations                      | <p>What were your motivations for getting involved in the project?</p>                                                                                                                                                                                                                                                                 | <p>Were these motivations realised during the project?</p>                                                                                                                                                                                                                                                                  |
| Understanding the group's aims   | <p>From your perspective, what are the key aims of the collaboration?</p> <p>How do you think these aims will be achieved?</p> <p>What things do you feel will be important in achieving these aims?</p>                                                                                                                               | <p>Now having experienced working on the project, what do you believe to be the most important aim(s)?</p> <p>And do you think any of these aims have been achieved?</p> <p>How did your role help achieve these aim(s)?</p>                                                                                                |
| General expectations/experiences | <p>What do you expect your participation in the collaboration will involve?</p> <p>Can you share with me any potential advantages of being a part of this collaborarion?</p> <p>Can you share with me any potential disadvantages of being a part of this collaborarion?</p>                                                           | <p>Please describe your role within this current collaboration?</p> <p>Can you share with me any advantage you experienced or observed in being a part of this collaborarion?</p> <p>Can you share with me any disadvantage you experienced or observed in being a part of this collaborarion?</p>                          |
| Mutual learning                  | <p>Can you give me an overview of your understanding of the term mutual learning?</p> <p>What do you feel that others may be able to learn from you over the next few years?</p> <p>What do you feel you may learn from others over the next few years?</p> <p>How do you see this process of mutual learning working in practice?</p> | <p>Do you think others learnt from your expertise? What specifically did you learn from others?</p> <p>[If appropriate] Have you been able to use of these skills and experiences in other roles?</p> <p>Do you feel the process of mutual learning took place during the project, and how did this happen in practice?</p> |

|                        |                                                                                                            |                                                                                                            |
|------------------------|------------------------------------------------------------------------------------------------------------|------------------------------------------------------------------------------------------------------------|
| <i>Closing remarks</i> | Is there anything you would like to add, or anything you feel we have not discussed that may be important? | Is there anything you would like to add, or anything you feel we have not discussed that may be important? |
|------------------------|------------------------------------------------------------------------------------------------------------|------------------------------------------------------------------------------------------------------------|

Appendix A Topic Guide

| Respondent ID | Country            | Position                | Expectation interviews | Experience interviews |
|---------------|--------------------|-------------------------|------------------------|-----------------------|
| R-01          | Bosnia-Herzegovina | Senior Investigator     | ✓                      | ✓                     |
| R-02          | Bosnia-Herzegovina | Researcher              | ✓                      |                       |
| R-03          | Bosnia-Herzegovina | Researcher              |                        | ✓                     |
| R-04          | Bosnia-Herzegovina | Researcher              |                        | ✓                     |
| R-05          | Colombia           | Senior Investigator     | ✓                      | ✓                     |
| R-06          | Colombia           | Senior Investigator     | ✓                      | ✓                     |
| R-07          | Colombia           | Coordination/management |                        | ✓                     |
| R-08          | Colombia           | Coordination/management |                        | ✓                     |
| R-09          | Colombia           | Researcher              | ✓                      | ✓                     |
| R-10          | Colombia           | Researcher              | ✓                      | ✓                     |
| R-11          | Colombia           | Researcher              | ✓                      |                       |
| R-12          | Colombia           | Researcher              | ✓                      |                       |
| R-13          | Colombia           | Researcher              |                        | ✓                     |
| R-14          | Colombia           | Researcher              |                        | ✓                     |
| R-15          | Colombia           | Researcher              |                        | ✓                     |
| R-16          | Uganda             | Senior Investigator     | ✓                      | ✓                     |
| R-17          | Uganda             | Senior Investigator     | ✓                      | ✓                     |
| R-18          | Uganda             | Senior Investigator     |                        | ✓                     |
| R-19          | Uganda             | Senior Investigator     |                        | ✓                     |
| R-20          | Uganda             | Coordination/management |                        | ✓                     |
| R-21          | Uganda             | Coordination/management | ✓                      | ✓                     |
| R-22          | Uganda             | Senior Investigator     | ✓                      |                       |
| R-23          | Uganda             | Senior Investigator     | ✓                      |                       |
| R-24          | Uganda             | Coordination/management | ✓                      |                       |
| R-25          | Uganda             | Researcher              |                        | ✓                     |
| R-26          | Uganda             | Researcher              |                        | ✓                     |
| R-27          | Uganda             | Researcher              |                        | ✓                     |
| R-28          | Uganda             | Researcher              |                        | ✓                     |
| R-29          | Uganda             | Researcher              |                        | ✓                     |
| R-30          | Uganda             | Researcher              |                        | ✓                     |
| R-31          | Uganda             | Researcher              |                        | ✓                     |
| R-32          | UK                 | Senior Investigator     | ✓                      | ✓                     |
| R-33          | UK                 | Senior Investigator     | ✓                      | ✓                     |
| R-34          | UK                 | Senior Investigator     | ✓                      |                       |
| R-35          | UK                 | Senior Investigator     | ✓                      |                       |
| R-36          | UK                 | Coordination/management | ✓                      | ✓                     |

|      |    |                         |  |   |
|------|----|-------------------------|--|---|
| R-37 | UK | Coordination/management |  | ✓ |
| R-38 | UK | Researcher              |  | ✓ |

Appendix B Participant characteristics
